# Supplementary material
Source: PubMed Central journal article supplement (PMC4287006)
Supplement: pro0023-1380-sd1.pdf [file pro0023-1380-sd1.pdf]

## Supplementary Material

### Crystal structures of three representatives of a new Pfam family PF14869 (DUF4488) suggest they function in sugar binding/uptake

Abhinav Kumar<sup>1,2</sup>, Marco Punta<sup>3,4</sup>, Herbert L. Axelrod<sup>1,2</sup>, Debanu Das<sup>1,2</sup>, Carol L. Farr<sup>1,5</sup>, Joanna C. Grant<sup>1,6</sup>, Hsiu-Ju Chiu<sup>1,2</sup>, Mitchell D. Miller<sup>1,2</sup>, Penelope C. Coggill<sup>3,4</sup>, Heath E. Klock<sup>1,6</sup>, Marc-André Elsliger<sup>1,5</sup>, Ashley M. Deacon<sup>1,2</sup>, Adam Godzik<sup>1,7,8</sup>, Scott A. Lesley<sup>1,5,6</sup>, and Ian A. Wilson<sup>1,5#</sup>

<sup>1</sup>Joint Center for Structural Genomics

<sup>2</sup>Stanford Synchrotron Radiation Lightsource, SLAC National Accelerator Laboratory, Menlo Park, California 94025, USA

<sup>3</sup>EMBL-European Bioinformatics Institute, Wellcome Trust Genome Campus, Hinxton, Cambridge CB10 1SD, UK

<sup>4</sup>Sanger Institute, Wellcome Trust Genome Campus, Hinxton, Cambridge CB10 1SA, UK

<sup>5</sup>Department of Integrative Structural and Computational Biology, The Scripps Research Institute, La Jolla, California 92037, USA

<sup>6</sup>Protein Sciences Department, Genomics Institute of the Novartis Research Foundation, San Diego, California 92121, USA

<sup>7</sup>Program on Bioinformatics and Systems Biology, Sanford-Burnham Medical Research Institute, La Jolla California 92037, USA

<sup>8</sup>Center for Research in Biological Systems, University of California, San Diego, La Jolla, California 92093, USA

**Running title:** Crystal Structures of Pfam PF14869 (DUF4488)

<sup>#</sup>To whom correspondence should be addressed: Ian A. Wilson, Joint Center for Structural Genomics, The Scripps Research Institute, 10550 N. Torrey Pines Rd., BCC206, La Jolla, CA 92037, USA. Tel.: 858-784-9706; Fax: 858-784-2980; E-mail: [wilson@scripps.edu](mailto:wilson@scripps.edu).

# HMMsearch (<http://hmm.janelia.org>) results for PF14869 family against UniProtKB

HMMER3/f [3.1b1 | May 2013]  
 NAME SEED  
 LENG 128  
 ALPH amino  
 RF no  
 MM no  
 CONS yes  
 CS no  
 MAP yes  
 DATE Wed Sep 11 20:29:17 2013  
 NSBQ 12  
 EPFN 1.350586  
 CKSUM 112009290  
 STATS LOCAL MSV -9.8359 0.71224  
 STATS LOCAL VITERBI -10.6336 0.71224  
 STATS LOCAL FORWARD -4.5820 0.71224

| HMM    | A       | C       | D       | E       | F       | G       | H       | I       | K       | L       | M       | N       | P       | Q       | R       | S       | T       | V       | W       | Y       |
|--------|---------|---------|---------|---------|---------|---------|---------|---------|---------|---------|---------|---------|---------|---------|---------|---------|---------|---------|---------|---------|
| COMPO  | m->m    | m->i    | m->d    | i->m    | i->i    | d->m    | d->d    |         |         |         |         |         |         |         |         |         |         |         |         |         |
| 0.1908 | 4.36469 | 5.08704 | 0.61958 | 0.77255 | 0.48576 | 0.95510 |         |         |         |         |         |         |         |         |         |         |         |         |         |         |
| 1      | 2.35000 | 5.01854 | 2.98239 | 2.07743 | 4.30664 | 3.46452 | 3.08044 | 3.32438 | 2.02637 | 3.29716 | 4.07599 | 2.96030 | 3.85618 | 2.77526 | 2.65617 | 2.50133 | 2.89781 | 3.05638 | 5.48521 | 4.11701 |
| 0.1908 | 4.36469 | 5.08704 | 0.61958 | 0.77255 | 0.48576 | 0.95510 |         |         |         |         |         |         |         |         |         |         |         |         |         |         |
| 2      | 2.68339 | 5.06045 | 2.92673 | 2.27161 | 4.38473 | 3.44821 | 3.67388 | 3.83832 | 2.43084 | 3.37104 | 4.14418 | 2.37048 | 3.15301 | 2.79206 | 2.66908 | 1.96682 | 2.50851 | 3.44779 | 5.54665 | 4.16815 |
| 0.1908 | 4.36469 | 5.08704 | 0.61958 | 0.77255 | 0.48576 | 0.95510 |         |         |         |         |         |         |         |         |         |         |         |         |         |         |
| 3      | 3.51153 | 4.80623 | 5.21813 | 4.64752 | 3.23713 | 4.80167 | 5.12376 | 2.29841 | 4.50219 | 0.79458 | 2.28707 | 4.87179 | 4.95632 | 4.55069 | 4.57130 | 4.15955 | 3.73078 | 1.99863 | 5.35199 | 4.32504 |
| 0.1908 | 4.36469 | 5.08704 | 0.61958 | 0.77255 | 0.48576 | 0.95510 |         |         |         |         |         |         |         |         |         |         |         |         |         |         |
| 4      | 2.50212 | 5.02623 | 2.98329 | 2.27239 | 4.31599 | 3.46761 | 3.25781 | 3.76002 | 2.04184 | 2.86396 | 4.08348 | 2.78429 | 3.85977 | 2.26806 | 2.86754 | 2.66809 | 2.90381 | 2.84959 | 5.49024 | 4.12300 |
| 0.1908 | 4.36469 | 5.08704 | 0.61958 | 0.77255 | 0.48576 | 0.95510 |         |         |         |         |         |         |         |         |         |         |         |         |         |         |
| 5      | 3.39229 | 5.09004 | 4.16327 | 4.13646 | 5.21537 | 0.25860 | 5.19645 | 4.96417 | 4.38232 | 4.54261 | 5.54204 | 4.33024 | 4.49272 | 4.66833 | 4.53687 | 3.58231 | 3.91001 | 4.39677 | 6.15161 | 5.34341 |
| 0.1908 | 4.36469 | 5.08704 | 0.61958 | 0.77255 | 0.48576 | 0.95510 |         |         |         |         |         |         |         |         |         |         |         |         |         |         |
| 6      | 3.34711 | 4.59075 | 5.28297 | 4.81086 | 3.87951 | 4.84161 | 5.53036 | 1.27410 | 4.72284 | 2.33847 | 3.64441 | 4.98525 | 5.11326 | 4.98093 | 4.89810 | 4.26161 | 3.61350 | 0.87252 | 5.93112 | 4.71592 |
| 0.1908 | 4.36469 | 5.08704 | 0.61958 | 0.77255 | 0.48576 | 0.95510 |         |         |         |         |         |         |         |         |         |         |         |         |         |         |
| 7      | 4.27687 | 5.44996 | 4.91744 | 4.76349 | 3.34591 | 4.34941 | 4.64125 | 4.36151 | 4.50060 | 3.65797 | 4.96516 | 4.82692 | 4.91121 | 4.85892 | 4.53155 | 4.47608 | 4.60826 | 4.26231 | 0.29260 | 3.32715 |
| 0.1908 | 4.36469 | 5.08704 | 0.61958 | 0.77255 | 0.48576 | 0.95510 |         |         |         |         |         |         |         |         |         |         |         |         |         |         |
| 8      | 3.40111 | 5.33592 | 3.35436 | 3.14814 | 5.57162 | 3.78046 | 4.29909 | 4.31447 | 2.94001 | 3.76142 | 4.80496 | 3.60115 | 4.25931 | 3.20086 | 3.44181 | 3.71180 | 4.02040 | 5.76154 | 4.50717 | 8.0     |
| 0.1908 | 4.36469 | 5.08704 | 0.61958 | 0.77255 | 0.48576 | 0.95510 |         |         |         |         |         |         |         |         |         |         |         |         |         |         |
| 9      | 2.67068 | 4.35232 | 3.61682 | 3.05229 | 3.47674 | 3.65852 | 3.92896 | 2.82050 | 2.96965 | 1.87061 | 2.39085 | 3.43422 | 4.04267 | 2.79667 | 3.29491 | 2.43398 | 2.65012 | 2.61155 | 4.94462 | 3.72055 |
| 0.1908 | 4.36469 | 5.08704 | 0.61958 | 0.77255 | 0.48576 | 0.95510 |         |         |         |         |         |         |         |         |         |         |         |         |         |         |
| 10     | 2.69442 | 4.47117 | 3.84726 | 2.69615 | 3.67490 | 3.62304 | 4.21184 | 2.69962 | 3.26513 | 2.66454 | 3.64021 | 3.65025 | 4.13440 | 3.59486 | 3.54270 | 2.97907 | 3.00820 | 2.09878 | 5.18646 | 3.96493 |
| 0.1908 | 4.36469 | 5.08704 | 0.61958 | 0.77255 | 0.48576 | 0.95510 |         |         |         |         |         |         |         |         |         |         |         |         |         |         |
| 11     | 2.64353 | 4.30447 | 3.16017 | 0.61958 | 0.77255 | 0.48576 | 0.95510 |         |         |         |         |         |         |         |         |         |         |         |         |         |
| 0.1908 | 4.36469 | 5.08704 | 0.61958 | 0.77255 | 0.48576 | 0.95510 |         |         |         |         |         |         |         |         |         |         |         |         |         |         |
| 12     | 2.87898 | 4.78476 | 3.10196 | 2.13638 | 3.20911 | 3.55804 | 3.72793 | 3.34547 | 2.75600 | 2.95224 | 3.91965 | 3.17422 | 4.02649 | 3.13381 | 3.11366 | 2.95654 | 3.12833 | 3.10750 | 4.73619 | 1.52066 |
| 0.1908 | 4.36469 | 5.08704 | 0.61958 | 0.77255 | 0.48576 | 0.95510 |         |         |         |         |         |         |         |         |         |         |         |         |         |         |
| 13     | 2.68620 | 4.21075 | 3.97610 | 3.39539 | 3.31388 | 3.76375 | 4.05489 | 2.29495 | 3.28493 | 1.94981 | 2.93079 | 3.67223 | 4.13217 | 3.54543 | 2.57942 | 2.75336 | 2.91856 | 1.86016 | 4.83061 | 3.63180 |
| 0.1908 | 4.36469 | 5.08704 | 0.61958 | 0.77255 | 0.48576 | 0.95510 |         |         |         |         |         |         |         |         |         |         |         |         |         |         |
| 14     | 2.62376 | 4.52726 | 3.41058 | 2.87182 | 3.86623 | 3.48594 | 3.91057 | 3.20405 | 2.78723 | 2.91487 | 3.78512 | 3.28550 | 3.95992 | 3.15277 | 2.59201 | 1.79154 | 2.50333 | 2.04112 | 5.24363 | 3.98589 |
| 0.1908 | 4.36469 | 5.08704 | 0.61958 | 0.77255 | 0.48576 | 0.95510 |         |         |         |         |         |         |         |         |         |         |         |         |         |         |
| 15     | 2.68468 | 5.13574 | 2.65939 | 2.01053 | 4.45354 | 3.09041 | 3.65066 | 3.92307 | 2.40699 | 3.42953 | 3.22240 | 2.70248 | 3.84763 | 2.17258 | 2.89788 | 2.33806 | 2.91805 | 3.51224 | 5.58443 | 4.18577 |
| 0.1908 | 4.36469 | 5.08704 | 0.61958 | 0.77255 | 0.48576 | 0.95510 |         |         |         |         |         |         |         |         |         |         |         |         |         |         |
| 16     | 2.65502 | 4.80216 | 3.08669 | 3.30224 | 4.04898 | 2.88934 | 3.71982 | 3.10078 | 2.53508 | 3.81437 | 3.89941 | 3.04984 | 2.98280 | 2.88243 | 2.99029 | 2.00516 | 2.67258 | 3.14301 | 5.33595 | 4.01309 |
| 0.1908 | 4.36469 | 5.08704 | 0.61958 | 0.77255 | 0.48576 | 0.95510 |         |         |         |         |         |         |         |         |         |         |         |         |         |         |
| 17     | 2.68368 | 4.80996 | 3.01476 | 2.23190 | 4.18020 | 2.31882 | 3.82466 | 3.57650 | 2.62606 | 3.20948 | 4.04001 | 3.08606 | 2.09004 | 2.99735 | 3.10969 | 2.74247 | 2.96187 | 2.57948 | 5.46773 | 4.14583 |
| 0.1908 | 4.36469 | 5.08704 | 0.61958 | 0.77255 | 0.48576 | 0.95510 |         |         |         |         |         |         |         |         |         |         |         |         |         |         |
| 18     | 2.32698 | 5.41980 | 2.01622 | 1.63644 | 4.73551 | 3.41981 | 3.77121 | 4.23527 | 2.62095 | 3.71402 | 4.48913 | 2.26502 | 3.92347 | 2.59909 | 3.15460 | 2.80063 | 3.12454 | 3.79850 | 5.85648 | 4.40463 |
| 0.1908 | 4.36469 | 5.08704 | 0.61958 | 0.77255 | 0.48576 | 0.95510 |         |         |         |         |         |         |         |         |         |         |         |         |         |         |
| 19     | 2.47820 | 4.42076 | 3.48598 | 2.91531 | 3.56532 | 3.62387 | 2.93759 | 2.69130 | 2.60463 | 2.28798 | 3.52144 | 3.33410 | 4.00336 | 3.17047 | 2.75481 | 2.86687 | 2.89392 | 1.99025 | 4.99512 | 3.75563 |
| 0.1908 | 4.36469 | 5.08704 | 0.61958 | 0.77255 | 0.48576 | 0.95510 |         |         |         |         |         |         |         |         |         |         |         |         |         |         |
| 20     | 2.60662 | 4.76291 | 2.53307 | 2.52376 | 4.25037 | 2.27900 | 3.80687 | 3.66830 | 2.66315 | 3.28402 | 4.10325 | 3.01402 | 2.07639 | 2.97426 | 3.12609 | 2.66018 | 2.91451 | 2.86270 | 5.51918 | 4.18279 |
| 0.1908 | 4.36469 | 5.08704 | 0.61958 | 0.77255 | 0.48576 | 0.95510 |         |         |         |         |         |         |         |         |         |         |         |         |         |         |
| 21     | 2.86880 | 4.52839 | 3.71926 | 3.24488 | 2.38801 | 1.77846 | 3.76887 | 3.07526 | 3.20079 | 2.70084 | 3.68868 | 3.54449 | 4.17722 | 3.46719 | 3.50327 | 3.06644 | 3.12714 | 2.86719 | 4.35357 | 1.96124 |
| 0.1908 | 4.36469 | 5.08704 | 0.61958 | 0.77255 | 0.48576 | 0.95510 |         |         |         |         |         |         |         |         |         |         |         |         |         |         |
| 22     | 2.69570 | 5.05799 | 3.00254 | 1.94050 | 4.36864 | 3.47489 | 3.63830 | 3.31472 | 1.96807 | 3.33420 | 4.11364 | 2.96529 | 3.86354 | 2.54637 | 3.25033 | 2.68382 | 2.92051 | 3.06949 | 5.49869 | 4.14301 |
| 0.1908 | 4.36469 | 5.08704 | 0.61958 | 0.77255 | 0.48576 | 0.95510 |         |         |         |         |         |         |         |         |         |         |         |         |         |         |
| 23     | 3.46521 | 4.74245 | 2.53467 | 4.66776 | 2.38934 | 4.76123 | 4.99793 | 1.66959 | 4.53099 | 0.92873 | 2.98037 | 4.84080 | 4.91323 | 4.53772 | 4.56641 | 4.11810 | 3.68134 | 2.37815 | 5.19319 | 4.05754 |
| 0.1908 | 4.36469 | 5.08704 | 0.61958 | 0.77255 | 0.48576 | 0.95510 |         |         |         |         |         |         |         |         |         |         |         |         |         |         |
| 24     | 2.46510 | 4.61223 | 3.31001 | 2.74936 | 3.81080 | 3.57801 | 3.81095 | 3.36072 | 1.84518 | 2.60085 | 3.71866 | 3.21385 | 3.97124 | 3.03578 | 3.04381 | 2.39915 | 2.92322 | 2.87130 | 5.18094 | 3.91076 |
| 0.1908 | 4.36469 | 5.08704 | 0.61958 | 0.77255 | 0.48576 | 0.95510 |         |         |         |         |         |         |         |         |         |         |         |         |         |         |
| 25     | 2.69822 | 4.44501 | 3.68809 | 3.20143 | 3.67497 | 3.59145 | 4.12193 | 2.90828 | 3.10716 | 1.63119 | 3.62105 | 3.53694 | 1.98579 | 3.45046 | 3.41856 | 2.93076 | 2.41824 | 2.70957 | 5.19364 | 3.96719 |
| 0.1908 | 4.36469 | 5.08704 | 0.61958 | 0.77255 | 0.48576 | 0.95510 |         |         |         |         |         |         |         |         |         |         |         |         |         |         |
| 26     | 2.64621 | 4.33906 | 3.66783 | 3.12847 | 3.53345 | 2.79366 | 3.99777 | 2.46047 | 0.60307 | 1.81992 | 3.50939 | 4.37786 | 4.04390 | 3.36533 | 3.38197 | 1.96880 | 2.91393 | 2.61001 | 5.00584 | 3.77884 |
| 0.1908 | 4.36469 | 5.08704 | 0.61958 | 0.77255 | 0.48576 | 0.95510 |         |         |         |         |         |         |         |         |         |         |         |         |         |         |
| 27     | 2.83702 | 4.94530 | 2.91744 | 2.75198 | 4.62806 | 3.38864 | 4.13425 | 4.18035 | 3.01721 | 3.76918 | 4.62139 | 1.54091 | 1.40814 | 3.33843 |         |         |         |         |         |         |

|    |         |         |         |         |         |         |         |         |         |         |         |         |         |         |         |         |         |         |         |         |    |   |   |   |   |
|----|---------|---------|---------|---------|---------|---------|---------|---------|---------|---------|---------|---------|---------|---------|---------|---------|---------|---------|---------|---------|----|---|---|---|---|
| 28 | 2.63352 | 4.46158 | 3.43846 | 2.89858 | 3.70589 | 3.54171 | 3.90591 | 3.02350 | 2.86183 | 2.52420 | 3.64793 | 2.71405 | 3.98059 | 3.18429 | 3.24025 | 2.08878 | 2.44119 | 1.96175 | 5.12254 | 3.87202 | 28 | v | - | - | - |
|    | 2.68618 | 4.42225 | 2.77519 | 2.73123 | 3.46354 | 2.40513 | 3.72494 | 3.29354 | 2.67741 | 2.69355 | 4.24690 | 2.90347 | 2.73739 | 3.18146 | 2.89801 | 2.37887 | 2.77519 | 2.98518 | 4.58477 | 3.61503 |    |   |   |   |   |
|    | 0.19098 | 4.36469 | 5.08704 | 0.61958 | 0.77255 | 0.48576 | 0.95510 |         |         |         |         |         |         |         |         |         |         |         |         |         |    |   |   |   |   |
|    | 3.14844 | 4.49497 | 4.88974 | 4.31156 | 2.5937  | 4.31784 | 4.44754 |         |         |         |         |         |         |         |         |         |         |         |         |         |    |   |   |   |   |
| 29 | 2.68618 | 4.42225 | 2.77519 | 2.73123 | 3.46354 | 2.40513 | 3.72494 | 2.52547 | 4.14216 | 1.09690 | 2.43193 | 4.38331 | 4.59002 | 4.21067 | 4.18102 | 3.64006 | 3.36944 | 2.57790 | 3.13691 | 3.46200 | 29 | l | - | - | - |
|    | 0.19098 | 4.36469 | 5.08704 | 0.61958 | 0.77255 | 0.48576 | 0.95510 |         |         |         |         |         |         |         |         |         |         |         |         |         |    |   |   |   |   |
| 30 | 3.51423 | 5.43040 | 3.71942 | 3.28155 | 4.93537 | 3.91392 | 4.14769 | 4.40628 | 0.51783 | 3.87455 | 4.83536 | 3.67298 | 4.40048 | 3.32958 | 2.66734 | 3.53951 | 3.74243 | 4.09595 | 5.80244 | 4.70381 | 30 | K | - | - | - |
|    | 2.68618 | 4.42225 | 2.77519 | 2.73123 | 3.46354 | 2.40513 | 3.72494 | 3.29354 | 2.67741 | 2.69355 | 4.24690 | 2.90347 | 2.73739 | 3.18146 | 2.89801 | 2.37887 | 2.77519 | 2.98518 | 4.58477 | 3.61503 |    |   |   |   |   |
|    | 0.19098 | 4.36469 | 5.08704 | 0.61958 | 0.77255 | 0.48576 | 0.95510 |         |         |         |         |         |         |         |         |         |         |         |         |         |    |   |   |   |   |
| 31 | 2.93223 | 4.55982 | 5.18212 | 4.65729 | 2.94649 | 4.70398 | 4.19877 |         |         |         |         |         |         |         |         |         |         |         |         |         |    |   |   |   |   |
|    | 2.68618 | 4.42225 | 2.77519 | 2.73123 | 3.46354 | 2.40513 | 3.72494 | 0.99272 | 4.55105 | 2.11457 | 4.42505 | 4.81047 | 4.95566 | 4.71944 | 4.67106 | 4.07837 | 3.53993 | 1.42969 | 5.54230 | 4.34593 | 31 | i | - | - | - |
|    | 0.19098 | 4.36469 | 5.08704 | 0.61958 | 0.77255 | 0.48576 | 0.95510 |         |         |         |         |         |         |         |         |         |         |         |         |         |    |   |   |   |   |
|    | 3.05170 | 4.41537 | 4.75748 | 4.17664 | 3.21779 | 4.55268 | 1.72260 | 4.02407 | 1.21574 | 3.14974 | 4.31806 | 4.55258 | 4.16749 | 4.12054 | 3.57700 | 3.28076 | 2.06055 | 5.00139 | 2.79931 | 32      | l  | - | - | - |   |
|    | 2.68618 | 4.42225 | 2.77519 | 2.73123 | 3.46354 | 2.40513 | 3.72494 | 3.29354 | 2.67741 | 2.69355 | 4.24690 | 2.90347 | 2.73739 | 3.18146 | 2.89801 | 2.37887 | 2.77519 | 2.98518 | 4.58477 | 3.61503 |    |   |   |   |   |
|    | 0.19098 | 4.36469 | 5.08704 | 0.61958 | 0.77255 | 0.48576 | 0.95510 |         |         |         |         |         |         |         |         |         |         |         |         |         |    |   |   |   |   |
| 33 | 2.58274 | 4.64374 | 3.10817 | 2.88709 | 4.64756 | 2.69464 | 4.19877 |         |         |         |         |         |         |         |         |         |         |         |         |         |    |   |   |   |   |
|    | 2.68618 | 4.42225 | 2.77519 | 2.73123 | 3.46354 | 2.40513 | 3.72494 | 4.12930 | 3.11908 | 3.73597 | 4.54233 | 2.41413 | 3.92731 | 3.40185 | 3.53165 | 1.00413 | 3.01922 | 3.57936 | 5.91504 | 4.61215 | 33 | s | - | - | - |
|    | 0.19098 | 4.36469 | 5.08704 | 0.61958 | 0.77255 | 0.48576 | 0.95510 |         |         |         |         |         |         |         |         |         |         |         |         |         |    |   |   |   |   |
| 34 | 2.49877 | 5.18974 | 1.85871 | 1.97365 | 4.51241 | 2.87006 | 3.70482 | 3.98251 | 2.49974 | 3.49624 | 4.26601 | 2.91478 | 3.28258 | 2.82324 | 3.00276 | 2.70952 | 2.98765 | 3.11125 | 5.65928 | 4.25181 | 34 | d | - | - | - |
|    | 2.68618 | 4.42225 | 2.77519 | 2.73123 | 3.46354 | 2.40513 | 3.72494 | 3.29354 | 2.67741 | 2.69355 | 4.24690 | 2.90347 | 2.73739 | 3.18146 | 2.89801 | 2.37887 | 2.77519 | 2.98518 | 4.58477 | 3.61503 |    |   |   |   |   |
|    | 0.19098 | 4.36469 | 5.08704 | 0.61958 | 0.77255 | 0.48576 | 0.95510 |         |         |         |         |         |         |         |         |         |         |         |         |         |    |   |   |   |   |
| 35 | 3.03762 | 5.44359 | 0.89305 | 2.36621 | 5.00666 | 2.76427 | 4.04069 |         |         |         |         |         |         |         |         |         |         |         |         |         |    |   |   |   |   |
|    | 2.68618 | 4.42225 | 2.77519 | 2.73123 | 3.46354 | 2.40513 | 3.72494 | 4.53851 | 3.10011 | 4.05865 | 4.90819 | 2.93292 | 4.02720 | 2.21993 | 3.69745 | 5.37777 | 3.38380 | 4.05391 | 6.21485 | 4.72660 | 35 | d | - | - | - |
|    | 0.19098 | 4.36469 | 5.08704 | 0.61958 | 0.77255 | 0.48576 | 0.95510 |         |         |         |         |         |         |         |         |         |         |         |         |         |    |   |   |   |   |
|    | 2.89119 | 5.23022 | 2.73865 | 2.45850 | 4.60531 | 1.50603 | 3.81611 | 4.05737 | 2.29624 | 3.58355 | 4.39675 | 2.37791 | 3.97566 | 2.60551 | 2.98470 | 2.86376 | 3.15032 | 3.66900 | 5.74605 | 4.37653 | 36 | g | - | - | - |
|    | 2.68618 | 4.42225 | 2.77519 | 2.73123 | 3.46354 | 2.40513 | 3.72494 | 3.29354 | 2.67741 | 2.69355 | 4.24690 | 2.90347 | 2.73739 | 3.18146 | 2.89801 | 2.37887 | 2.77519 | 2.98518 | 4.58477 | 3.61503 |    |   |   |   |   |
|    | 0.19098 | 4.36469 | 5.08704 | 0.61958 | 0.77255 | 0.48576 | 0.95510 |         |         |         |         |         |         |         |         |         |         |         |         |         |    |   |   |   |   |
| 37 | 2.85007 | 5.08528 | 1.55212 | 2.39339 | 4.27873 | 3.58787 | 3.72081 |         |         |         |         |         |         |         |         |         |         |         |         |         |    |   |   |   |   |
|    | 2.68618 | 4.42225 | 2.77519 | 2.73123 | 3.46354 | 2.40513 | 3.72494 | 3.83053 | 2.13232 | 3.36579 | 4.18115 | 3.10425 | 3.98411 | 2.85430 | 1.96758 | 2.85339 | 1.71174 | 3.48558 | 5.52624 | 4.22969 | 37 | t | - | - | - |
|    | 0.19098 | 4.36469 | 5.08704 | 0.61958 | 0.77255 | 0.48576 | 0.95510 |         |         |         |         |         |         |         |         |         |         |         |         |         |    |   |   |   |   |
| 38 | 3.50544 | 4.81639 | 5.00686 | 4.55968 | 0.96156 | 4.59692 | 4.40032 | 2.01403 | 4.05119 | 1.95806 | 3.34706 | 4.57556 | 4.87619 | 4.46404 | 4.46712 | 3.98047 | 3.74774 | 2.56571 | 4.59782 | 3.03722 | 38 | f | - | - | - |
|    | 2.68618 | 4.42225 | 2.77519 | 2.73123 | 3.46354 | 2.40513 | 3.72494 | 3.29354 | 2.67741 | 2.69355 | 4.24690 | 2.90347 | 2.73739 | 3.18146 | 2.89801 | 2.37887 | 2.77519 | 2.98518 | 4.58477 | 3.61503 |    |   |   |   |   |
|    | 0.19098 | 4.36469 | 5.08704 | 0.61958 | 0.77255 | 0.48576 | 0.95510 |         |         |         |         |         |         |         |         |         |         |         |         |         |    |   |   |   |   |
| 39 | 2.67795 | 4.28249 | 4.24060 | 3.65164 | 3.80238 | 4.11981 |         |         |         |         |         |         |         |         |         |         |         |         |         |         |    |   |   |   |   |
|    | 2.68618 | 4.42225 | 2.77519 | 2.73123 | 3.46354 | 2.40513 | 3.72494 | 2.14752 | 3.51768 | 2.27353 | 4.20689 | 3.82259 | 4.16876 | 3.72248 | 3.66830 | 2.65899 | 2.82324 | 2.02792 | 4.75523 | 3.56792 | 39 | v | - | - | - |
|    | 0.19098 | 4.36469 | 5.08704 | 0.61958 | 0.77255 | 0.48576 | 0.95510 |         |         |         |         |         |         |         |         |         |         |         |         |         |    |   |   |   |   |
| 40 | 2.77225 | 4.65221 | 3.37910 | 2.92464 | 3.80213 | 3.61042 | 3.99197 | 3.00243 | 2.87198 | 2.34640 | 3.81562 | 1.44452 | 4.07816 | 3.24902 | 3.24141 | 2.92846 | 3.05232 | 2.38030 | 5.27448 | 3.94933 | 40 | n | - | - | - |
|    | 2.68618 | 4.42225 | 2.77519 | 2.73123 | 3.46354 | 2.40513 | 3.72494 | 3.29354 | 2.67741 | 2.69355 | 4.24690 | 2.90347 | 2.73739 | 3.18146 | 2.89801 | 2.37887 | 2.77519 | 2.98518 | 4.58477 | 3.61503 |    |   |   |   |   |
|    | 0.19098 | 4.36469 | 5.08704 | 0.61958 | 0.77255 | 0.48576 | 0.95510 |         |         |         |         |         |         |         |         |         |         |         |         |         |    |   |   |   |   |
| 41 | 3.19879 | 5.08528 | 0.84122 | 4.50708 | 4.99248 | 4.85727 | 1.39737 | 4.35869 | 1.59728 | 2.72871 | 4.61642 | 4.74614 | 4.44822 | 4.40674 | 3.83600 | 3.42817 | 1.68852 | 5.21121 | 4.09767 | 41      | i  | - | - | - |   |
|    | 2.68618 | 4.42225 | 2.77519 | 2.73123 | 3.46354 | 2.40513 | 3.72494 | 3.29354 | 2.67741 | 2.69355 | 4.24690 | 2.90347 | 2.73739 | 3.18146 | 2.89801 | 2.37887 | 2.77519 | 2.98518 | 4.58477 | 3.61503 |    |   |   |   |   |
|    | 0.19098 | 4.36469 | 5.08704 | 0.61958 | 0.77255 | 0.48576 | 0.95510 |         |         |         |         |         |         |         |         |         |         |         |         |         |    |   |   |   |   |
| 42 | 2.70084 | 4.20867 | 4.03402 | 3.45299 | 3.30049 | 3.78995 | 4.08631 | 2.34625 | 3.34437 | 1.96878 | 2.61760 | 3.71591 | 4.15536 | 3.59240 | 2.85351 | 3.07041 | 2.29458 | 1.95119 | 4.83281 | 3.63847 | 42 | v | - | - | - |
|    | 2.68618 | 4.42225 | 2.77519 | 2.73123 | 3.46354 | 2.40513 | 3.72494 | 3.29354 | 2.67741 | 2.69355 | 4.24690 | 2.90347 | 2.73739 | 3.18146 | 2.89801 | 2.37887 | 2.77519 | 2.98518 | 4.58477 | 3.61503 |    |   |   |   |   |
|    | 0.19098 | 4.36469 | 5.08704 | 0.61958 | 0.77255 | 0.48576 | 0.95510 |         |         |         |         |         |         |         |         |         |         |         |         |         |    |   |   |   |   |
| 43 | 2.95411 | 4.92549 | 4.49298 | 3.92480 | 3.91212 | 4.12504 | 1.91801 | 3.79965 | 1.05003 | 1.58265 | 4.13916 | 4.46623 | 4.01746 | 3.97749 | 3.44008 | 2.45699 | 1.96956 | 5.10873 | 3.94356 | 43      | m  | - | - | - |   |
|    | 2.68618 | 4.42225 | 2.77519 | 2.73123 | 3.46354 | 2.40513 | 3.72494 | 3.29354 | 2.67741 | 2.69355 | 4.24690 | 2.90347 | 2.73739 | 3.18146 | 2.89801 | 2.37887 | 2.77519 | 2.98518 | 4.58477 | 3.61503 |    |   |   |   |   |
|    | 0.19098 | 4.36469 | 5.08704 | 0.61958 | 0.77255 | 0.48576 | 0.95510 |         |         |         |         |         |         |         |         |         |         |         |         |         |    |   |   |   |   |
| 44 | 2.39099 | 4.69843 | 2.73408 | 2.47338 | 3.04953 | 3.42174 | 3.64321 | 3.32305 | 2.46487 | 2.95190 | 3.78390 | 2.98081 | 3.81863 | 2.58613 | 2.63864 | 2.64268 | 2.48917 | 3.02220 | 5.22134 | 3.90528 | 44 | a | - | - | - |
|    | 2.68622 | 4.42229 | 2.77524 | 2.73127 | 3.46358 | 2.40493 | 3.72499 | 3.29358 | 2.67745 | 2.69359 | 4.24619 | 2.90351 | 2.73744 | 3.18151 | 2.89784 | 2.37891 | 2.77524 | 2.98523 | 4.58481 | 3.61507 |    |   |   |   |   |
|    | 0.17851 | 1.86404 | 4.77475 | 0.66340 | 0.72281 | 0.32117 | 1.29207 |         |         |         |         |         |         |         |         |         |         |         |         |         |    |   |   |   |   |
| 45 | 2.65649 | 4.81270 | 8.00066 | 2.26270 | 4.03894 | 3.48742 | 3.70500 |         |         |         |         |         |         |         |         |         |         |         |         |         |    |   |   |   |   |
|    | 2.68618 | 4.42225 | 2.77519 | 2.73123 | 3.46354 | 2.40513 | 3.72494 | 2.84791 | 2.51746 | 3.06533 | 2.83235 | 2.49765 | 3.88712 | 2.86557 | 2.74980 | 2.70412 | 2.66714 | 2.86548 | 5.32436 | 3.99663 | 47 | e | - | - | - |
|    | 0.19098 | 4.36469 | 5.08704 | 0.61958 | 0.77255 | 0.48576 | 0.95510 |         |         |         |         |         |         |         |         |         |         |         |         |         |    |   |   |   |   |
| 46 | 2.49191 | 5.15917 | 2.88043 | 2.23661 | 4.48577 | 3.65846 | 3.95427 | 1.97686 | 3.45408 | 4.21285 | 2.68400 | 2.56553 | 2.41237 | 2.87290 | 2.67507 | 2.93924 | 3.54155 | 5.60192 | 4.20717 | 48      | k  | - | - | - |   |
|    | 2.68618 | 4.42225 | 2.77519 | 2.73123 | 3.46354 | 2.40513 | 3.72494 | 3.29354 | 2.67741 | 2.69355 | 4.24690 | 2.90347 | 2.73739 | 3       |         |         |         |         |         |         |    |   |   |   |   |

|    |         |         |         |         |         |         |         |         |         |         |         |         |         |         |         |         |         |         |         |         |    |   |   |   |
|----|---------|---------|---------|---------|---------|---------|---------|---------|---------|---------|---------|---------|---------|---------|---------|---------|---------|---------|---------|---------|----|---|---|---|
| 64 | 2.74007 | 5.02947 | 2.82239 | 2.47832 | 4.47240 | 2.23556 | 3.20115 | 3.94370 | 2.63196 | 3.49512 | 4.29154 | 1.86678 | 3.91333 | 2.95823 | 3.10635 | 2.07841 | 3.02525 | 3.53559 | 5.67434 | 4.29651 | 66 | n | - | - |
|    | 2.68618 | 4.42225 | 2.77519 | 2.73123 | 3.46354 | 2.40513 | 3.22494 | 2.29354 | 2.67741 | 2.69355 | 4.24690 | 2.90347 | 2.73739 | 3.18146 | 2.89801 | 2.37887 | 2.77519 | 2.98518 | 4.58477 | 3.61503 |    |   |   |   |
|    | 0.19098 | 4.36469 | 5.08704 | 0.61958 | 0.77255 | 0.48576 | 0.95510 |         |         |         |         |         |         |         |         |         |         |         |         |         |    |   |   |   |
| 65 | 2.46721 | 4.21619 | 3.91917 | 3.34379 | 3.34243 | 3.73624 | 4.03990 | 2.38981 | 3.25651 | 2.24631 | 2.74223 | 3.63496 | 4.11327 | 3.51365 | 3.50998 | 2.53428 | 2.06558 | 2.07501 | 4.84650 | 3.64256 | 67 | t | - | - |
|    | 2.68618 | 4.42225 | 2.77519 | 2.73123 | 3.46354 | 2.40513 | 3.72494 | 2.29354 | 2.67741 | 2.69355 | 4.24690 | 2.90347 | 2.73739 | 3.18146 | 2.89801 | 2.37887 | 2.77519 | 2.98518 | 4.58477 | 3.61503 |    |   |   |   |
|    | 0.19098 | 4.36469 | 5.08704 | 0.61958 | 0.77255 | 0.48576 | 0.95510 |         |         |         |         |         |         |         |         |         |         |         |         |         |    |   |   |   |
| 66 | 3.42158 | 4.82092 | 4.53027 | 4.11770 | 2.51403 | 4.32858 | 3.93114 | 2.27052 | 3.91721 | 2.56012 | 3.78724 | 4.15819 | 4.68886 | 4.11901 | 4.05786 | 3.69572 | 3.66752 | 2.88884 | 4.19352 | 0.87736 | 68 | y | - | - |
|    | 2.68618 | 4.42225 | 2.77519 | 2.73123 | 3.46354 | 2.40513 | 3.72494 | 2.29354 | 2.67741 | 2.69355 | 4.24690 | 2.90347 | 2.73739 | 3.18146 | 2.89801 | 2.37887 | 2.77519 | 2.98518 | 4.58477 | 3.61503 |    |   |   |   |
|    | 0.19098 | 4.36469 | 5.08704 | 0.61958 | 0.77255 | 0.48576 | 0.95510 |         |         |         |         |         |         |         |         |         |         |         |         |         |    |   |   |   |
| 67 | 2.45919 | 4.54530 | 3.41562 | 2.87619 | 3.82808 | 3.55680 | 3.91104 | 3.04285 | 2.20558 | 2.84954 | 3.74199 | 3.30373 | 3.99908 | 3.15666 | 3.15167 | 8.34116 | 1.92199 | 2.00428 | 5.22342 | 3.96687 | 69 | t | - | - |
|    | 2.68618 | 4.42225 | 2.77519 | 2.73123 | 3.46354 | 2.40513 | 3.72494 | 2.29354 | 2.67741 | 2.69355 | 4.24690 | 2.90347 | 2.73739 | 3.18146 | 2.89801 | 2.37887 | 2.77519 | 2.98518 | 4.58477 | 3.61503 |    |   |   |   |
|    | 0.19098 | 4.36469 | 5.08704 | 0.61958 | 0.77255 | 0.48576 | 0.95510 |         |         |         |         |         |         |         |         |         |         |         |         |         |    |   |   |   |
| 68 | 3.49037 | 5.61509 | 2.82823 | 0.48659 | 5.04142 | 3.67714 | 4.34623 | 4.60529 | 3.30087 | 4.15161 | 5.13582 | 3.34717 | 4.31412 | 3.57145 | 3.74040 | 3.43813 | 3.80843 | 4.24816 | 6.11266 | 4.87842 | 70 | E | - | - |
|    | 2.68618 | 4.42225 | 2.77519 | 2.73123 | 3.46354 | 2.40513 | 3.72494 | 2.29354 | 2.67741 | 2.69355 | 4.24690 | 2.90347 | 2.73739 | 3.18146 | 2.89801 | 2.37887 | 2.77519 | 2.98518 | 4.58477 | 3.61503 |    |   |   |   |
|    | 0.19098 | 4.36469 | 5.08704 | 0.61958 | 0.77255 | 0.48576 | 0.95510 |         |         |         |         |         |         |         |         |         |         |         |         |         |    |   |   |   |
| 69 | 2.65361 | 3.76470 | 3.24841 | 2.68866 | 3.77954 | 3.55079 | 2.98863 | 2.85029 | 2.47960 | 2.83272 | 3.23088 | 2.87324 | 3.93601 | 2.64436 | 3.08368 | 2.41520 | 2.88499 | 2.89965 | 5.14961 | 2.83536 | 71 | s | - | - |
|    | 2.68618 | 4.42225 | 2.77519 | 2.73123 | 3.46354 | 2.40513 | 3.72494 | 2.29354 | 2.67741 | 2.69355 | 4.24690 | 2.90347 | 2.73739 | 3.18146 | 2.89801 | 2.37887 | 2.77519 | 2.98518 | 4.58477 | 3.61503 |    |   |   |   |
|    | 0.19098 | 4.36469 | 5.08704 | 0.61958 | 0.77255 | 0.48576 | 0.95510 |         |         |         |         |         |         |         |         |         |         |         |         |         |    |   |   |   |
| 70 | 3.35470 | 4.59226 | 5.29659 | 4.78615 | 3.72362 | 4.84788 | 5.40497 | 2.18568 | 4.69195 | 1.79235 | 3.49568 | 4.96011 | 5.07436 | 4.88573 | 4.83008 | 4.24097 | 3.60406 | 1.08211 | 5.75751 | 4.59211 | 72 | v | - | - |
|    | 2.68618 | 4.42225 | 2.77519 | 2.73123 | 3.46354 | 2.40513 | 3.72494 | 2.29354 | 2.67741 | 2.69355 | 4.24690 | 2.90347 | 2.73739 | 3.18146 | 2.89801 | 2.37887 | 2.77519 | 2.98518 | 4.58477 | 3.61503 |    |   |   |   |
|    | 0.19098 | 4.36469 | 5.08704 | 0.61958 | 0.77255 | 0.48576 | 0.95510 |         |         |         |         |         |         |         |         |         |         |         |         |         |    |   |   |   |
| 71 | 2.80928 | 5.23649 | 2.80017 | 1.56061 | 4.58072 | 2.98018 | 3.72509 | 4.03929 | 1.82024 | 3.54082 | 3.21217 | 2.95419 | 3.91921 | 2.84599 | 2.89786 | 2.77170 | 2.72553 | 3.63413 | 5.68655 | 4.30115 | 73 | e | - | - |
|    | 2.68618 | 4.42225 | 2.77519 | 2.73123 | 3.46354 | 2.40513 | 3.72494 | 2.29354 | 2.67741 | 2.69355 | 4.24690 | 2.90347 | 2.73739 | 3.18146 | 2.89801 | 2.37887 | 2.77519 | 2.98518 | 4.58477 | 3.61503 |    |   |   |   |
|    | 0.19098 | 4.36469 | 5.08704 | 0.61958 | 0.77255 | 0.48576 | 0.95510 |         |         |         |         |         |         |         |         |         |         |         |         |         |    |   |   |   |
| 72 | 2.81778 | 5.01078 | 3.13766 | 2.68249 | 4.54147 | 2.68279 | 3.82990 | 3.94411 | 1.19980 | 3.49175 | 4.31040 | 3.15292 | 3.99136 | 2.97308 | 2.75757 | 2.84644 | 2.55442 | 3.55471 | 5.64456 | 4.35262 | 74 | k | - | - |
|    | 2.68618 | 4.42225 | 2.77519 | 2.73123 | 3.46354 | 2.40513 | 3.72494 | 2.29354 | 2.67741 | 2.69355 | 4.24690 | 2.90347 | 2.73739 | 3.18146 | 2.89801 | 2.37887 | 2.77519 | 2.98518 | 4.58477 | 3.61503 |    |   |   |   |
|    | 0.19098 | 4.36469 | 5.08704 | 0.61958 | 0.77255 | 0.48576 | 0.95510 |         |         |         |         |         |         |         |         |         |         |         |         |         |    |   |   |   |
| 73 | 2.61309 | 4.22214 | 0.74114 | 2.75374 | 4.51169 | 2.99808 | 3.03064 | 3.95864 | 2.88551 | 3.56409 | 4.37113 | 1.51501 | 3.91640 | 3.20769 | 3.31442 | 1.77100 | 3.62866 | 3.48649 | 5.76268 | 4.44238 | 75 | n | - | - |
|    | 2.68618 | 4.42227 | 2.77521 | 2.73125 | 3.46356 | 2.40514 | 3.72496 | 2.29356 | 2.67742 | 2.69357 | 4.24691 | 2.90348 | 2.73741 | 3.18148 | 2.89802 | 2.37888 | 2.77521 | 2.98494 | 4.58479 | 3.61505 |    |   |   |   |
|    | 0.10819 | 2.33962 | 5.08704 | 0.33208 | 1.26382 | 0.48576 | 0.95510 |         |         |         |         |         |         |         |         |         |         |         |         |         |    |   |   |   |
| 74 | 2.55602 | 4.25250 | 4.45956 | 3.88791 | 3.40898 | 4.02375 | 4.39902 | 1.78915 | 3.76014 | 1.77441 | 3.35765 | 4.06245 | 4.38218 | 3.97698 | 3.91930 | 2.86524 | 3.08467 | 1.51996 | 5.01957 | 3.82932 | 77 | v | - | - |
|    | 2.68618 | 4.42225 | 2.77519 | 2.73123 | 3.46354 | 2.40513 | 3.72494 | 2.29354 | 2.67741 | 2.69355 | 4.24690 | 2.90347 | 2.73739 | 3.18146 | 2.89801 | 2.37887 | 2.77519 | 2.98518 | 4.58477 | 3.61503 |    |   |   |   |
|    | 0.19098 | 4.36469 | 5.08704 | 0.61958 | 0.77255 | 0.48576 | 0.95510 |         |         |         |         |         |         |         |         |         |         |         |         |         |    |   |   |   |
| 75 | 2.71932 | 4.79263 | 2.57053 | 2.61817 | 2.74929 | 3.55439 | 2.18284 | 4.40732 | 2.62666 | 3.02491 | 3.87912 | 3.11477 | 3.94982 | 2.96153 | 3.07131 | 4.12264 | 2.95210 | 3.11825 | 5.07956 | 3.17086 | 78 | h | - | - |
|    | 2.68618 | 4.42225 | 2.77519 | 2.73123 | 3.46354 | 2.40513 | 3.72494 | 2.29354 | 2.67741 | 2.69355 | 4.24690 | 2.90347 | 2.73739 | 3.18146 | 2.89801 | 2.37887 | 2.77519 | 2.98518 | 4.58477 | 3.61503 |    |   |   |   |
|    | 0.19098 | 4.36469 | 5.08704 | 0.61958 | 0.77255 | 0.48576 | 0.95510 |         |         |         |         |         |         |         |         |         |         |         |         |         |    |   |   |   |
| 76 | 2.71637 | 4.80674 | 2.23398 | 2.57381 | 4.05620 | 3.48481 | 3.80685 | 3.45128 | 2.67520 | 1.82861 | 3.94602 | 3.08043 | 2.87573 | 2.99433 | 3.12782 | 2.53095 | 2.97160 | 3.15174 | 5.38184 | 4.06128 | 79 | l | - | - |
|    | 2.68618 | 4.42225 | 2.77519 | 2.73123 | 3.46354 | 2.40513 | 3.72494 | 2.29354 | 2.67741 | 2.69355 | 4.24690 | 2.90347 | 2.73739 | 3.18146 | 2.89801 | 2.37887 | 2.77519 | 2.98518 | 4.58477 | 3.61503 |    |   |   |   |
|    | 0.19098 | 4.36469 | 5.08704 | 0.61958 | 0.77255 | 0.48576 | 0.95510 |         |         |         |         |         |         |         |         |         |         |         |         |         |    |   |   |   |
| 77 | 2.52455 | 4.29646 | 6.88546 | 2.93985 | 4.07621 | 3.32475 | 2.7777  | 3.30873 | 3.26307 | 3.12925 | 4.03770 | 3.52647 | 1.34702 | 3.58379 | 3.57524 | 2.39047 | 2.94969 | 1.99509 | 5.0607  | 4.27199 | 80 | p | - | - |
|    | 2.68618 | 4.42225 | 2.77519 | 2.73123 | 3.46354 | 2.40513 | 3.72494 | 2.29354 | 2.67741 | 2.69355 | 4.24690 | 2.90347 | 2.73739 | 3.18146 | 2.89801 | 2.37887 | 2.77519 | 2.98518 | 4.58477 | 3.61503 |    |   |   |   |
|    | 0.19098 | 4.36469 | 5.08704 | 0.61958 | 0.77255 | 0.48576 | 0.95510 |         |         |         |         |         |         |         |         |         |         |         |         |         |    |   |   |   |
| 78 | 2.66191 | 4.41233 | 3.49424 | 2.93333 | 2.38313 | 3.62214 | 3.87837 | 2.91218 | 2.87873 | 2.61052 | 2.83298 | 3.34774 | 4.00834 | 2.23775 | 3.23782 | 2.63629 | 2.49769 | 2.68724 | 4.98462 | 3.73754 | 81 | q | - | - |
|    | 2.68618 | 4.42225 | 2.77519 | 2.73123 | 3.46354 | 2.40513 | 3.72494 | 2.29354 | 2.67741 | 2.69355 | 4.24690 | 2.90347 | 2.73739 | 3.18146 | 2.89801 | 2.37887 | 2.77519 | 2.98518 | 4.58477 | 3.61503 |    |   |   |   |
|    | 0.19098 | 4.36469 | 5.08704 | 0.61958 | 0.77255 | 0.48576 | 0.95510 |         |         |         |         |         |         |         |         |         |         |         |         |         |    |   |   |   |
| 79 | 2.72485 | 4.22440 | 8.86115 | 3.10554 | 3.77705 | 3.77705 | 0.54581 | 4.42696 | 3.22248 | 3.61958 | 2.70791 | 3.63311 | 3.41577 | 3.62936 | 3.49366 | 3.04624 | 2.95579 | 2.28896 | 4.88750 | 3.69142 | 82 | l | - | - |
|    | 2.68618 | 4.42225 | 2.77519 | 2.73123 | 3.46354 | 2.40513 | 3.72494 | 2.29354 | 2.67741 | 2.69355 | 4.24690 | 2.90347 | 2.73739 | 3.18146 | 2.89801 | 2.37887 | 2.77519 | 2.98518 | 4.58477 | 3.61503 |    |   |   |   |
|    | 0.19098 | 4.36469 | 5.08704 | 0.61958 | 0.77255 | 0.48576 | 0.95510 |         |         |         |         |         |         |         |         |         |         |         |         |         |    |   |   |   |
| 80 | 2.49173 | 5.12009 | 2.52202 | 2.24175 | 4.43838 | 3.44149 | 3.64160 | 3.90702 | 2.19333 | 3.41393 | 4.16935 | 2.54105 | 3.31678 | 2.55169 | 2.88191 | 2.47230 | 2.90394 | 2.70060 | 5.56873 | 4.17217 | 83 | k | - | - |
|    | 2.68618 | 4.42225 | 2.77519 | 2.73123 | 3.46354 | 2.40513 | 3.72494 | 2.29354 | 2.67741 | 2.69355 | 4.24690 | 2.90347 | 2.73739 | 3.18146 | 2.89801 | 2.37887 | 2.77519 | 2.98518 | 4.58477 | 3.61503 |    |   |   |   |
|    | 0.19098 | 4.36469 | 5.08704 | 0.61958 | 0.77255 | 0.48576 | 0.95510 |         |         |         |         |         |         |         |         |         |         |         |         |         |    |   |   |   |
| 81 | 2.90495 | 4.30025 | 5.91029 | 2.02842 | 4.64339 | 3.60222 | 3.16501 | 4.12470 | 2.66526 | 3.64579 | 4.45247 | 2.24854 | 3.95893 | 2.96202 | 3.16351 | 2.85317 | 3.16473 | 3.72610 | 5.81278 | 4.39397 | 84 | g | - | - |
|    | 2.68618 | 4.42225 | 2.77519 | 2.73123 | 3.46354 | 2.40513 | 3.72494 | 2.29354 | 2.67741 | 2.69355 | 4.24690 | 2.90347 | 2.73739 | 3.18146 | 2.89801 | 2.37887 | 2.77519 | 2.98518 | 4.58477 | 3.61503 |    |   |   |   |
|    | 0.19098 | 4.36469 | 5.08704 |         |         |         |         |         |         |         |         |         |         |         |         |         |         |         |         |         |    |   |   |   |

|     |         |         |         |         |         |         |         |         |         |         |         |         |         |         |         |         |         |         |         |         |     |   |   |   |
|-----|---------|---------|---------|---------|---------|---------|---------|---------|---------|---------|---------|---------|---------|---------|---------|---------|---------|---------|---------|---------|-----|---|---|---|
| 100 | 4.22463 | 5.29054 | 5.14395 | 4.96765 | 1.06191 | 4.83191 | 3.64625 | 3.83415 | 4.77643 | 3.06305 | 4.39202 | 4.43699 | 5.11024 | 4.56517 | 4.67565 | 4.22876 | 4.43333 | 3.78037 | 3.73992 | 0.94699 | 104 | y | - | - |
|     | 2.68618 | 4.42225 | 2.77519 | 2.73123 | 3.46354 | 2.40513 | 3.72494 | 3.29354 | 2.67741 | 2.69355 | 4.24690 | 2.90347 | 2.73739 | 3.18146 | 2.89801 | 2.37887 | 2.77519 | 2.98518 | 4.58477 | 3.61503 |     |   |   |   |
|     | 0.01908 | 4.36469 | 5.08704 | 0.61958 | 0.77255 | 0.48576 | 0.95510 |         |         |         |         |         |         |         |         |         |         |         |         |         |     |   |   |   |
| 101 | 2.67507 | 4.65877 | 3.22857 | 2.67015 | 2.55189 | 3.55410 | 3.09946 | 3.23466 | 1.95337 | 2.89120 | 3.74756 | 3.15217 | 3.94070 | 2.97880 | 3.04082 | 2.54775 | 2.66237 | 2.96447 | 5.15629 | 3.36214 | 105 | k | - | - |
|     | 2.68618 | 4.42225 | 2.77519 | 2.73123 | 3.46354 | 2.40513 | 3.72494 | 3.29354 | 2.67741 | 2.69355 | 4.24690 | 2.90347 | 2.73739 | 3.18146 | 2.89801 | 2.37887 | 2.77519 | 2.98518 | 4.58477 | 3.61503 |     |   |   |   |
|     | 0.01908 | 4.36469 | 5.08704 | 0.61958 | 0.77255 | 0.48576 | 0.95510 |         |         |         |         |         |         |         |         |         |         |         |         |         |     |   |   |   |
| 102 | 3.08537 | 4.41865 | 4.87275 | 4.30080 | 3.39332 | 4.35881 | 4.73691 | 1.68368 | 4.16404 | 1.39818 | 2.76442 | 4.44206 | 4.64973 | 4.31867 | 4.26582 | 3.68977 | 2.84949 | 1.60858 | 5.19865 | 4.05507 | 106 | l | - | - |
|     | 2.68618 | 4.42225 | 2.77519 | 2.73123 | 3.46354 | 2.40513 | 3.72494 | 3.29354 | 2.67741 | 2.69355 | 4.24690 | 2.90347 | 2.73739 | 3.18146 | 2.89801 | 2.37887 | 2.77519 | 2.98518 | 4.58477 | 3.61503 |     |   |   |   |
|     | 0.01908 | 4.36469 | 5.08704 | 0.61958 | 0.77255 | 0.48576 | 0.95510 |         |         |         |         |         |         |         |         |         |         |         |         |         |     |   |   |   |
| 103 | 2.52918 | 5.13435 | 2.59554 | 2.22183 | 4.45803 | 3.44384 | 3.67676 | 3.99646 | 2.14945 | 4.49383 | 4.25472 | 2.91636 | 3.05866 | 2.90111 | 2.92047 | 2.69466 | 2.96812 | 3.85053 | 5.64155 | 4.23771 | 107 | k | - | - |
|     | 2.68618 | 4.42225 | 2.77519 | 2.73123 | 3.46354 | 2.40513 | 3.72494 | 3.29354 | 2.67741 | 2.69355 | 4.24690 | 2.90347 | 2.73739 | 3.18146 | 2.89801 | 2.37887 | 2.77519 | 2.98518 | 4.58477 | 3.61503 |     |   |   |   |
|     | 0.01908 | 4.36469 | 5.08704 | 0.61958 | 0.77255 | 0.48576 | 0.95510 |         |         |         |         |         |         |         |         |         |         |         |         |         |     |   |   |   |
| 104 | 2.74532 | 5.21673 | 2.52713 | 2.20521 | 4.54004 | 2.25845 | 3.69030 | 4.01574 | 1.94103 | 3.51438 | 4.27733 | 2.66924 | 3.87514 | 2.80378 | 2.96040 | 2.70488 | 2.51937 | 3.59845 | 5.66456 | 4.25497 | 108 | k | - | - |
|     | 2.68618 | 4.42225 | 2.77519 | 2.73123 | 3.46354 | 2.40513 | 3.72494 | 3.29354 | 2.67741 | 2.69355 | 4.24690 | 2.90347 | 2.73739 | 3.18146 | 2.89801 | 2.37887 | 2.77519 | 2.98518 | 4.58477 | 3.61503 |     |   |   |   |
|     | 0.01908 | 4.36469 | 5.08704 | 0.61958 | 0.77255 | 0.48576 | 0.95510 |         |         |         |         |         |         |         |         |         |         |         |         |         |     |   |   |   |
| 105 | 2.69211 | 5.13435 | 2.11819 | 2.38893 | 4.45803 | 3.44384 | 3.64926 | 3.92341 | 2.22716 | 4.42728 | 4.18611 | 2.93140 | 3.85487 | 2.55135 | 2.23765 | 3.35924 | 2.92330 | 3.13573 | 5.57777 | 4.18756 | 109 | d | - | - |
|     | 2.68635 | 4.42256 | 2.77518 | 2.73109 | 3.46385 | 2.40479 | 3.72526 | 2.29307 | 2.67730 | 2.69328 | 4.24721 | 2.90219 | 2.73771 | 3.18177 | 2.89815 | 2.37918 | 2.77551 | 2.98549 | 4.58508 | 3.61534 |     |   |   |   |
|     | 0.33845 | 1.26957 | 5.08704 | 1.52382 | 0.24574 | 0.48576 | 0.95510 |         |         |         |         |         |         |         |         |         |         |         |         |         |     |   |   |   |
| 106 | 3.07081 | 5.70197 | 1.56212 | 1.70711 | 4.99828 | 2.82946 | 3.89922 | 4.53022 | 2.87794 | 3.99326 | 4.80988 | 1.79245 | 3.99937 | 3.04858 | 3.47408 | 2.95417 | 3.34772 | 4.07655 | 6.13830 | 4.62303 | 116 | d | - | - |
|     | 2.68618 | 4.42225 | 2.77519 | 2.73123 | 3.46354 | 2.40513 | 3.72494 | 3.29354 | 2.67741 | 2.69355 | 4.24690 | 2.90347 | 2.73739 | 3.18146 | 2.89801 | 2.37887 | 2.77519 | 2.98518 | 4.58477 | 3.61503 |     |   |   |   |
|     | 0.01908 | 4.36469 | 5.08704 | 0.61958 | 0.77255 | 0.48576 | 0.95510 |         |         |         |         |         |         |         |         |         |         |         |         |         |     |   |   |   |
| 107 | 2.66197 | 3.93970 | 2.99144 | 2.29112 | 4.26893 | 2.97075 | 3.66007 | 3.70872 | 2.06294 | 2.26589 | 4.05009 | 2.96702 | 3.85707 | 2.59013 | 2.67175 | 2.23280 | 2.68640 | 3.02981 | 5.46443 | 4.10070 | 117 | k | - | - |
|     | 2.68618 | 4.42225 | 2.77519 | 2.73123 | 3.46354 | 2.40513 | 3.72494 | 3.29354 | 2.67741 | 2.69355 | 4.24690 | 2.90347 | 2.73739 | 3.18146 | 2.89801 | 2.37887 | 2.77519 | 2.98518 | 4.58477 | 3.61503 |     |   |   |   |
|     | 0.01908 | 4.36469 | 5.08704 | 0.61958 | 0.77255 | 0.48576 | 0.95510 |         |         |         |         |         |         |         |         |         |         |         |         |         |     |   |   |   |
| 108 | 2.74787 | 4.60689 | 3.43913 | 2.85249 | 3.74321 | 3.64010 | 3.81543 | 3.15574 | 2.38327 | 3.70473 | 3.28772 | 2.81841 | 3.06560 | 2.62253 | 2.89351 | 2.97163 | 2.90975 | 2.03981 | 3.84569 | 3.61503 | 118 | w | - | - |
|     | 2.68618 | 4.42225 | 2.77519 | 2.73123 | 3.46354 | 2.40513 | 3.72494 | 3.29354 | 2.67741 | 2.69355 | 4.24690 | 2.90347 | 2.73739 | 3.18146 | 2.89801 | 2.37887 | 2.77519 | 2.98518 | 4.58477 | 3.61503 |     |   |   |   |
|     | 0.01908 | 4.36469 | 5.08704 | 0.61958 | 0.77255 | 0.48576 | 0.95510 |         |         |         |         |         |         |         |         |         |         |         |         |         |     |   |   |   |
| 109 | 2.35132 | 3.68401 | 4.19342 | 3.60276 | 2.88111 | 2.89512 | 0.60802 | 2.54304 | 3.46863 | 2.29267 | 3.21471 | 4.12732 | 3.67419 | 3.62020 | 2.76511 | 2.87550 | 1.96567 | 3.62941 | 2.81212 | 3.61503 | 119 | v | - | - |
|     | 2.68618 | 4.42225 | 2.77519 | 2.73123 | 3.46354 | 2.40513 | 3.72494 | 3.29354 | 2.67741 | 2.69355 | 4.24690 | 2.90347 | 2.73739 | 3.18146 | 2.89801 | 2.37887 | 2.77519 | 2.98518 | 4.58477 | 3.61503 |     |   |   |   |
|     | 0.01908 | 4.36469 | 5.08704 | 0.61958 | 0.77255 | 0.48576 | 0.95510 |         |         |         |         |         |         |         |         |         |         |         |         |         |     |   |   |   |
| 110 | 2.66219 | 4.65032 | 3.21534 | 2.65877 | 3.83767 | 3.54169 | 2.56041 | 2.32860 | 2.45267 | 2.88882 | 3.74207 | 3.14292 | 3.93098 | 2.97266 | 3.04638 | 2.42564 | 2.24566 | 2.49757 | 5.19048 | 3.37983 | 120 | t | - | - |
|     | 2.68618 | 4.42225 | 2.77519 | 2.73123 | 3.46354 | 2.40513 | 3.72494 | 3.29354 | 2.67741 | 2.69355 | 4.24690 | 2.90347 | 2.73739 | 3.18146 | 2.89801 | 2.37887 | 2.77519 | 2.98518 | 4.58477 | 3.61503 |     |   |   |   |
|     | 0.01908 | 4.36469 | 5.08704 | 0.61958 | 0.77255 | 0.48576 | 0.95510 |         |         |         |         |         |         |         |         |         |         |         |         |         |     |   |   |   |
| 111 | 3.49037 | 5.15109 | 2.82823 | 0.48659 | 5.04142 | 3.67714 | 3.46233 | 4.60529 | 3.30087 | 4.19351 | 5.13582 | 3.34717 | 4.31412 | 3.57145 | 3.74040 | 4.43813 | 3.80843 | 4.24816 | 6.11266 | 4.87842 | 121 | E | - | - |
|     | 2.68618 | 4.42225 | 2.77519 | 2.73123 | 3.46354 | 2.40513 | 3.72494 | 3.29354 | 2.67741 | 2.69355 | 4.24690 | 2.90347 | 2.73739 | 3.18146 | 2.89801 | 2.37887 | 2.77519 | 2.98518 | 4.58477 | 3.61503 |     |   |   |   |
|     | 0.01908 | 4.36469 | 5.08704 | 0.61958 | 0.77255 | 0.48576 | 0.95510 |         |         |         |         |         |         |         |         |         |         |         |         |         |     |   |   |   |
| 112 | 2.66150 | 4.40899 | 3.49516 | 2.93296 | 3.54929 | 3.62247 | 3.87465 | 2.32951 | 2.47742 | 2.62516 | 3.51653 | 3.34641 | 4.00731 | 3.19125 | 3.21888 | 2.53293 | 2.31390 | 2.68173 | 4.98582 | 2.44575 | 122 | t | - | - |
|     | 2.68618 | 4.42225 | 2.77519 | 2.73123 | 3.46354 | 2.40513 | 3.72494 | 3.29354 | 2.67741 | 2.69355 | 4.24690 | 2.90347 | 2.73739 | 3.18146 | 2.89801 | 2.37887 | 2.77519 | 2.98518 | 4.58477 | 3.61503 |     |   |   |   |
|     | 0.01908 | 4.36469 | 5.08704 | 0.61958 | 0.77255 | 0.48576 | 0.95510 |         |         |         |         |         |         |         |         |         |         |         |         |         |     |   |   |   |
| 113 | 4.27697 | 4.45496 | 9.1744  | 4.76349 | 3.24591 | 4.34951 | 4.64125 | 4.36151 | 4.50060 | 3.65797 | 4.96516 | 4.82692 | 4.91121 | 4.85892 | 4.53155 | 4.47608 | 4.60826 | 4.26231 | 0.29260 | 3.32715 | 123 | W | - | - |
|     | 2.68618 | 4.42225 | 2.77519 | 2.73123 | 3.46354 | 2.40513 | 3.72494 | 3.29354 | 2.67741 | 2.69355 | 4.24690 | 2.90347 | 2.73739 | 3.18146 | 2.89801 | 2.37887 | 2.77519 | 2.98518 | 4.58477 | 3.61503 |     |   |   |   |
|     | 0.01908 | 4.36469 | 5.08704 | 0.61958 | 0.77255 | 0.48576 | 0.95510 |         |         |         |         |         |         |         |         |         |         |         |         |         |     |   |   |   |
| 114 | 2.35461 | 4.63115 | 3.24716 | 2.68301 | 2.93486 | 3.55577 | 2.28710 | 3.19823 | 1.96914 | 2.54206 | 3.71946 | 3.16172 | 3.94036 | 2.98641 | 2.78663 | 2.77768 | 2.89731 | 2.93223 | 5.15977 | 3.34114 | 124 | k | - | - |
|     | 2.68618 | 4.42225 | 2.77519 | 2.73123 | 3.46354 | 2.40513 | 3.72494 | 3.29354 | 2.67741 | 2.69355 | 4.24690 | 2.90347 | 2.73739 | 3.18146 | 2.89801 | 2.37887 | 2.77519 | 2.98518 | 4.58477 | 3.61503 |     |   |   |   |
|     | 0.01908 | 4.36469 | 5.08704 | 0.61958 | 0.77255 | 0.48576 | 0.95510 |         |         |         |         |         |         |         |         |         |         |         |         |         |     |   |   |   |
| 115 | 3.42352 | 5.45469 | 3.94625 | 3.16419 | 5.00679 | 3.96729 | 3.81322 | 4.31389 | 1.65676 | 3.69355 | 4.58859 | 3.50632 | 4.31525 | 2.94678 | 0.85503 | 3.41157 | 3.55411 | 4.00797 | 5.67028 | 4.57302 | 125 | r | - | - |
|     | 2.68618 | 4.42225 | 2.77519 | 2.73123 | 3.46354 | 2.40513 | 3.72494 | 3.29354 | 2.67741 | 2.69355 | 4.24690 | 2.90347 | 2.73739 | 3.18146 | 2.89801 | 2.37887 | 2.77519 | 2.98518 | 4.58477 | 3.61503 |     |   |   |   |
|     | 0.01908 | 4.36469 | 5.08704 | 0.61958 | 0.77255 | 0.48576 | 0.95510 |         |         |         |         |         |         |         |         |         |         |         |         |         |     |   |   |   |
| 116 | 2.70580 | 4.50427 | 4.98289 | 4.49036 | 3.84824 | 4.52505 | 5.18562 | 1.58722 | 4.39362 | 4.42670 | 3.65281 | 4.66291 | 4.87909 | 4.65893 | 4.58528 | 3.91503 | 3.45912 | 0.83685 | 5.74114 | 4.52768 | 126 | v | - | - |
|     | 2.68618 | 4.42225 | 2.77519 | 2.73123 | 3.46354 | 2.40513 | 3.72494 | 3.29354 | 2.67741 | 2.69355 | 4.24690 | 2.90347 | 2.73739 | 3.18146 | 2.89801 | 2.37887 | 2.77519 | 2.98518 | 4.58477 | 3.61503 |     |   |   |   |
|     | 0.01908 | 4.36469 | 5.08704 | 0.61958 | 0.77255 | 0.48576 | 0.95510 |         |         |         |         |         |         |         |         |         |         |         |         |         |     |   |   |   |
| 117 | 2.71344 | 5.06553 | 2.93442 | 1.93703 | 4.36278 | 3.09371 | 3.68253 | 3.80558 | 2.07795 | 2.78608 | 4.13303 | 2.96767 | 2.49419 | 2.80643 | 2.88480 | 2.70358 | 2.94648 | 3.43223 | 5.53172 | 4.16432 | 127 | e | - | - |
|     | 2.68618 | 4.42225 | 2.77519 | 2.73123 | 3.46354 | 2.40513 | 3.72494 | 3.29354 | 2.67741 | 2.69355 | 4.24690 | 2.90347 | 2.73739 | 3.18146 | 2.89801 | 2.37887 | 2.77519 | 2.98518 | 4.58477 | 3.61503 |     |   |   |   |
|     | 0.      |         |         |         |         |         |         |         |         |         |         |         |         |         |         |         |         |         |         |         |     |   |   |   |
